# Supplementary material
Source: PubMed Central journal article supplement (PMC4715527)

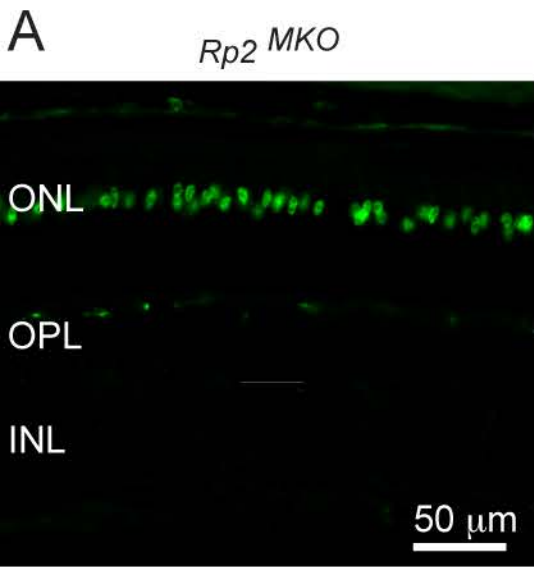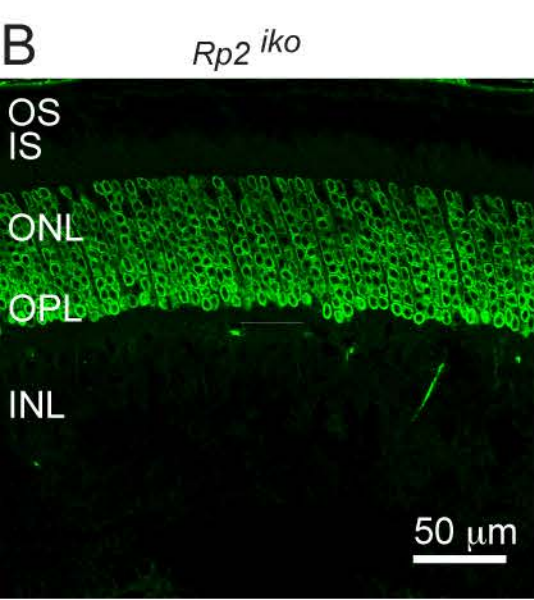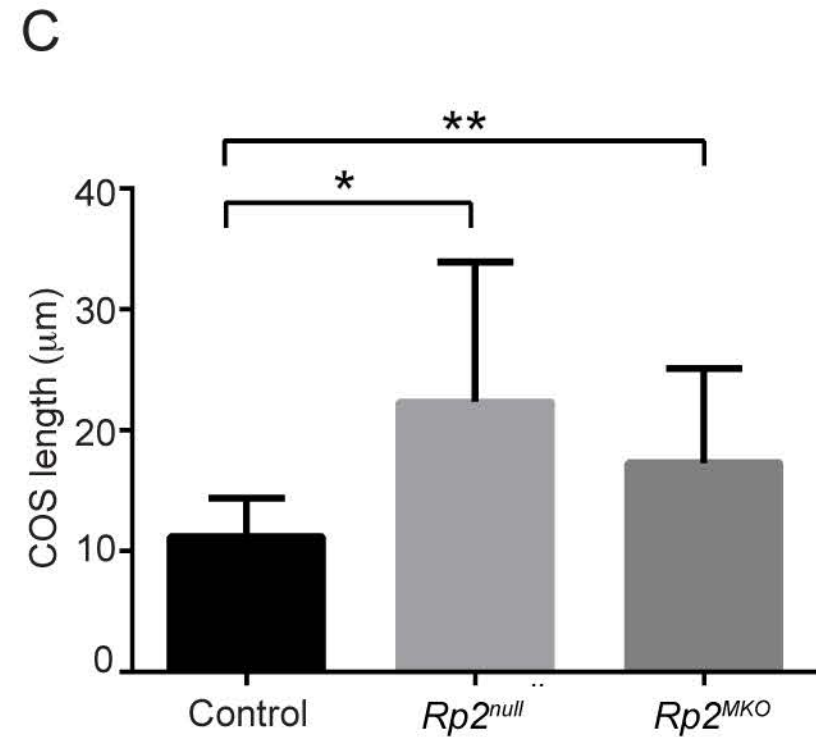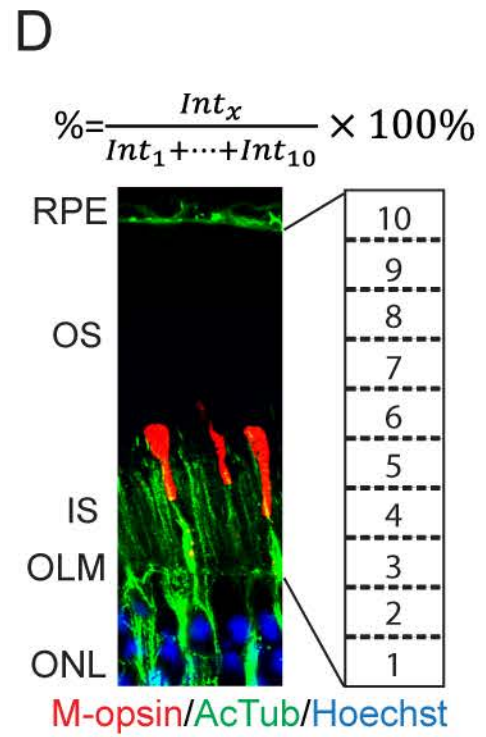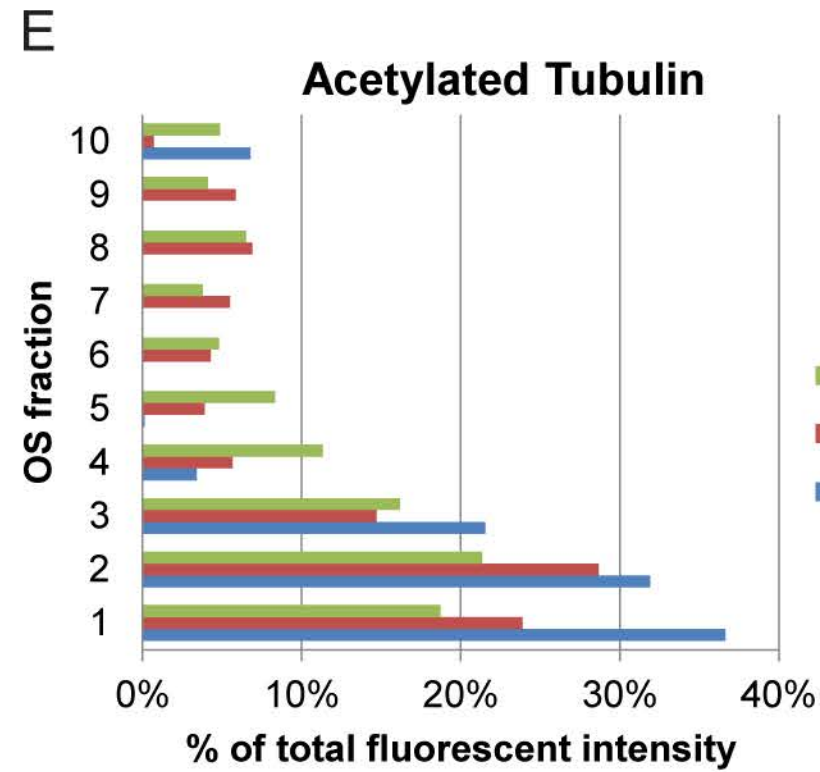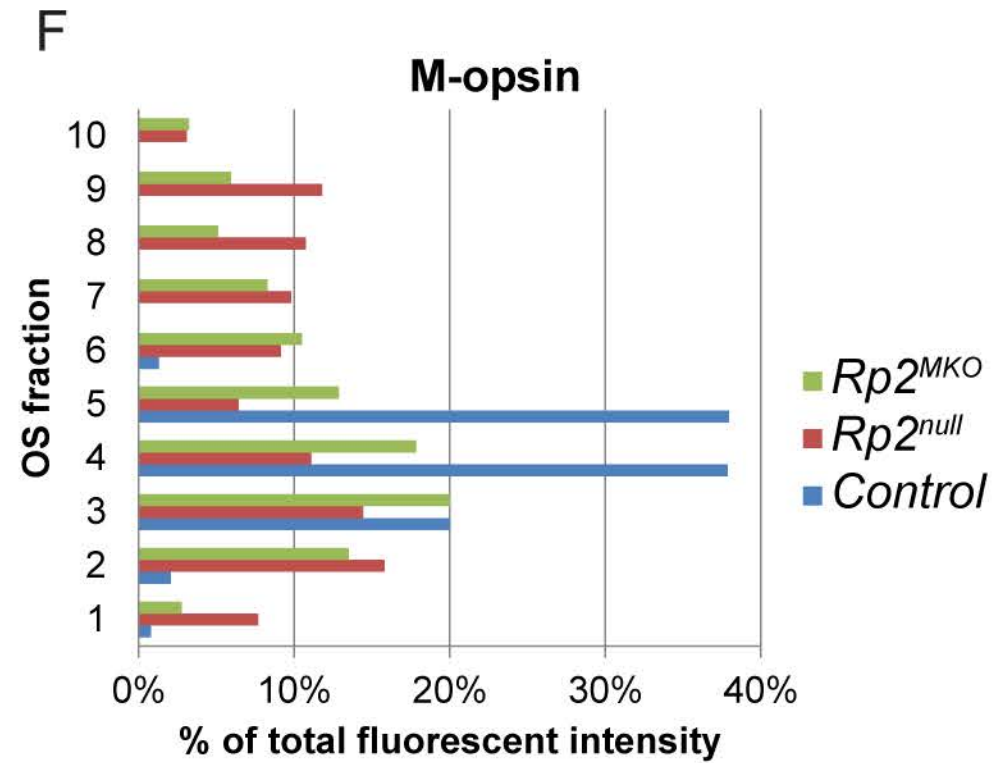

Control

*Rp2*<sup>null</sup>

*Rp2*<sup>MKO</sup>

RDS M-opsin DAPI

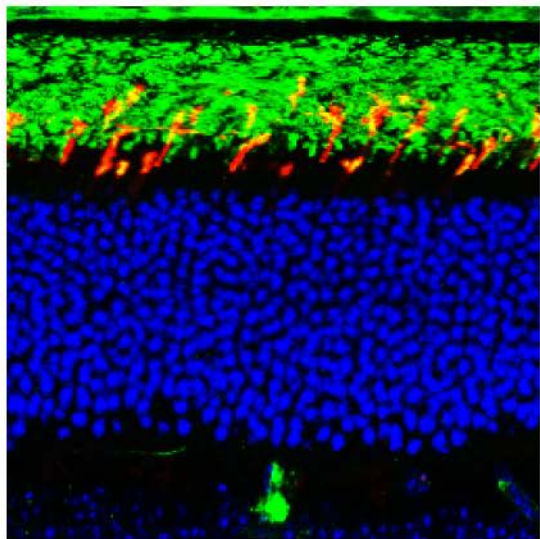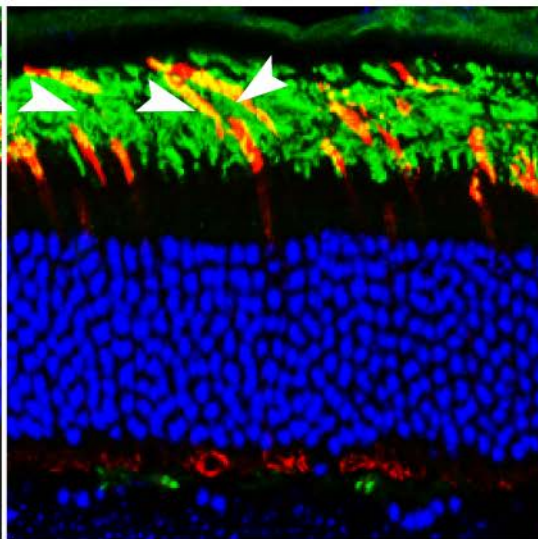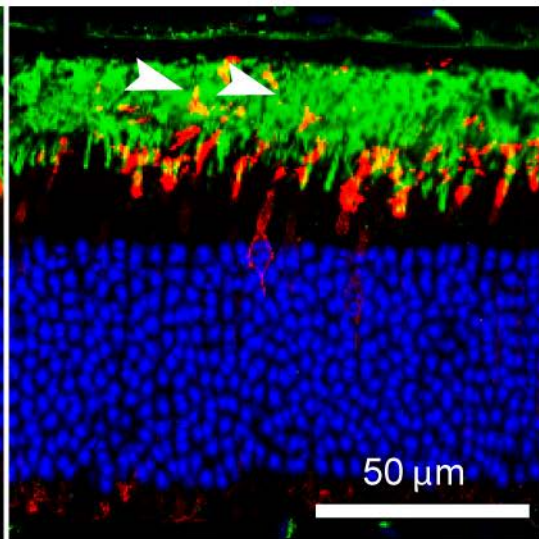

RPE

OS

IS

ONL

OPL

50  $\mu$ m

Supplement: NIHMS723684-supplement-Supp_FigureS1-S2.pdf [file NIHMS723684-supplement-Supp_FigureS1-S2.pdf]
